# Supplementary material for: Boosting the kinetics of PET glycolysis
Source: Royal Society of Chemistry journal article supplement (doi:10.1039/d4re00235k), 2024-01-01
Supplement: d4re00235k1.pdf [file d4re00235k1.pdf]

# Electronic Supplementary Information

## Boosting the kinetics of PET Glycolysis

Maria Schlüter,<sup>†,‡</sup> Ryota Enomoto,<sup>†</sup> Shin Makino,<sup>†</sup> Lisa Weihs,<sup>¶</sup> Cyra Lina Stamm,<sup>†</sup> Kerstin Wohlgemuth,<sup>‡</sup> and Christoph Held<sup>\*,†,¶</sup>

<sup>†</sup>*TU Dortmund University, Department of Biochemical and Chemical Engineering,  
Laboratory of Fluid Separations, 44227 Dortmund, Germany*

<sup>‡</sup>*TU Dortmund University, Department of Biochemical and Chemical Engineering,  
Laboratory of Plant and Process Design, 44227 Dortmund, Germany*

<sup>¶</sup>*TU Dortmund University, Department of Biochemical and Chemical Engineering,  
Laboratory of Thermodynamics, 44227 Dortmund, Germany*

E-mail: christoph.held@tu-dortmund.de

Phone: +49 231 755 2086

# A. Detailed Experimental Section

## A.1 Materials

Table S1 presents a comprehensive list of the chemicals used in this study, along with their purities.

Table S1: Characteristics of chemicals used in this work.

| Chemical                          | Abbreviation      | CAS        | $M$<br>/g mol <sup>-1</sup> | Supplier                                          | Type        | Purity<br>/w.-% |
|-----------------------------------|-------------------|------------|-----------------------------|---------------------------------------------------|-------------|-----------------|
| Poly(ethylene terephthalate)      | PET               | 25038-59-9 | 58,000 <sup>a</sup>         | Colorless single-use post-consumer bottles ("JA") |             |                 |
| Ethylene glycol                   | EG                | 107-21-1   | 62.07                       | Sigma-Aldrich                                     | ReagentPlus | 99              |
| Zinc acetate                      | ZnAc <sub>2</sub> | 557-34-6   | 183.48                      | Sigma-Aldrich                                     |             | 99.99           |
| $\gamma$ -valerolactone           | GVL               | 108-29-2   | 100.12                      | Sigma-Aldrich                                     | ReagentPlus | 99              |
| Water                             | H <sub>2</sub> O  | 7789-18-5  | 18.015                      | Deionized                                         |             |                 |
| Acetone                           | -                 | 67-64-1    | 58.08                       | VWR international                                 | TECHNICAL   | 99              |
| Bis(2-hydroxyethyl) terephthalate | BHET              | 959-26-2   | 254.238                     | Sigma-Aldrich                                     |             | 98.1            |
| Methanol                          | -                 | 67-56-1    | 32.04                       | VWR international                                 | HiPerSolv   | 99.8            |

<sup>a</sup> Mass average molecular weight determined by ASTM D 4603 standard test method in previous work<sup>1</sup>

The PET used in this study was sourced from colorless single-use post-consumer "JA" water bottles. To eliminate surface residues such as glue and ink, a minimal amount of acetone was used. Subsequently, the caps and labels were removed; further, the top and bottom part of the bottles were not used because of the enlarged wall thickness. The remaining material was manually cut into 5×5×0.2 mm pieces. Following this, the PET particles were shredded into small particles using a grinder (Quadblade CH 580, Kenwood Ltd). These crushed PET particles underwent fractionation in a sieving tower. Unless otherwise stated, the experiments were carried out with a particle size fraction of  $0.2 \leq d_p < 1$  mm.

## A.2 Sample Preparation for PET Glycolysis kinetic investigations

The experiments were conducted in 20 ml glass vials, that served as batch reactors. About 0.65 g of PET was transferred to each glass vial. The relatively small PET particle size ( $0.2 \leq d_p < 1$  mm), although not currently employed in industrial applications, was chosen

for its ability to enable homogeneous mixing of the reactants in our small glass vial reactor, as previously investigated.<sup>2</sup> Subsequently, a specific quantity of the ZnAc<sub>2</sub>/EG catalyst solution was added. Additionally, pure EG and, when under investigation, GVL were transferred to the vial. For all experiments, the molar ratio of PET's repeating unit to ZnAc<sub>2</sub> ( $\frac{n_{PETru}^0}{n_{ZnAc_2}}$ ) at the beginning of the reaction was set to 50 to accelerate the depolymerization accordingly. Moreover, the initial mass ratio of solvent to PET ( $\frac{m_{EG}^0+m_{GVL}}{m_{PET}^0}$ ) was maintained at 6. This choice not only ensures a sufficient space-time yield of produced BHET per input material PET but also facilitates easier handling of the suspension due to lower viscosity. Finally, the overall liquid volume in each reaction vial resulted in approximately 3.5 ml. Afterwards, a small magnetic stirrer was added.

### A.3 Set-Up and Procedure for PET Glycolysis kinetic investigations

The experimental set-up is illustrated in Figure S1.

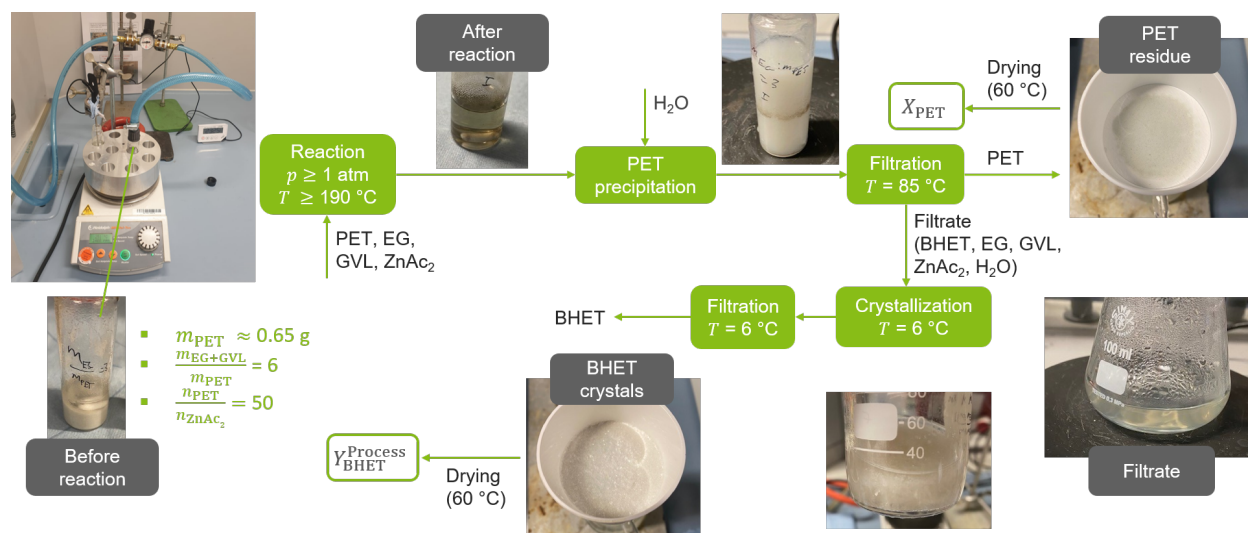

Figure S1: Experimental set-up of our lab scale process (adapted from<sup>2,3</sup>).

In order to conduct the depolymerization reactions, a magnetic hot plate stirrer (Heidolph MR Hei-Tec) was used. A cylindrical alumina heating block with perforations for holding the glass vials was positioned on the heating plate. Before initiating the reaction, the heating block was preheated to the desired temperature. As mentioned earlier, all the samples

including the catalyst were prepared at ambient conditions and put in the pre-heated aluminum block for the reaction. The time required for the samples to reach the desired reaction temperature was preliminary investigated. Figure S2 illustrates temperature profiles of thermal oil samples with a heat capacity comparable with that of EG in the heating block after transitioning from ambient conditions.

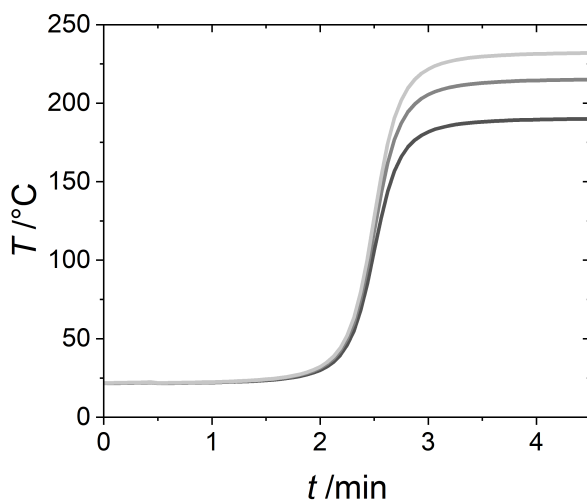

Figure S2: Temperature profiles of thermal oil samples while heating up from ambient temperature to 190 °C (dark grey), 215 °C (mid-grey) and 232 °C (dark grey) at 1 bar and a stirrer speed of 1400 rpm.

The sigmoidal temperature profiles indicate a time of 3 minutes to reach the intended reaction temperature. During the kinetic investigations, temperature monitoring of the suspensions was carried out using a thermometer (TFA Dostmann LT-101) with an accuracy of  $\pm 0.5$  K, placed in a reference vial containing the aforementioned thermal oil. For pressurized reactions, the glass vials were connected to an air pressure port, as illustrated in Figure S1. Following pressure adjustments, if necessary, the vials were placed inside the heating block for 3 minutes of pre-heating plus the specified reaction time. To mitigate the influence of the pre-heating on the reaction kinetic results, the experimental data points were assigned by a dead time of 3 minutes; this is reasonable since it is known from literature that the depolymerization of PET hardly takes place at temperatures lower than 170 °C.<sup>3,4</sup> Stirring at 1400 rpm was applied to ensure uniform mixing of the samples. Subsequently, the samples

were withdrawn and allowed to cool to 90 °C without external utilities. After removing the caps, the vials were filled with 14 ml of hot (90 °C) water, enabling an easier transfer and further treatment of these reaction mixtures. The suspensions were filtered using glass microfibre filters (grade GF/C-1.2 µm, Whatman) by applying vacuum. Thereby, the original reaction mixtures were separated into two different fractions. The solid residual fraction, primarily composed of unconverted PET, and the liquid filtrate fraction, consisting mainly of BHET, EG, water and ZnAc<sub>2</sub>. The residue solid fraction was dried overnight in an oven at a temperature of 60 °C to determine the conversion of the initial PET substrate using Equation S1.

$$X_{PET} = \frac{m_{PET}^0 - m_{PET}}{m_{PET}^0} \cdot 100 \quad (S1)$$

Here  $m_{PET}^0$  is the initial mass of PET and  $m_{PET}$  denotes the mass of incompletely depolymerized PET after a certain reaction time, obtained from weighing the filter paper with dried material.

The filtrate fraction was stored in the refrigerator at 6 °C overnight to induce crystallization of the BHET product. The resulting white crystalline BHET was subsequently filtered (MN GF-1-0.7 µm, Macherey-Nagel) under vacuum. The crystals were then dried overnight in an oven at a temperature of 60 °C. To calculate the process yield Equation S2 was applied.

$$Y_{BHET}^{process} = \frac{m_{BHET}/M_{BHET}}{m_{PET}^0/M_{PETru}} \cdot 100 \quad (S2)$$

In this equation,  $m_{BHET}$  represents the mass of crystallized and dried BHET, while  $M$  denotes the molecular weight. Therefore, the process yield quantifies the number of BHET molecules obtained as a solid product from the entire PET glycolysis process per mole of PET's repeating unit. Table 2 provides an overview of all the experimental kinetic series conducted in this work classified in the respective objectives mentioned in the introduction. Every experimental data point was measured twice. Based on that, a mean value and a standard deviation was calculated for the PET conversion  $X_{PET}$  and process yield  $Y_{BHET}^{process}$ .

## A.4 Analytical Quantification of Glycolysis Products

Previous studies<sup>2,3</sup> already have demonstrated the feasibility of selectively isolating unconverted PET from the residual filtrate using the procedure described earlier. Additionally, it has been confirmed in these studies, that the crystallized solid in the obtained filtrate predominantly comprises the BHET monomer with minor quantities of the BHET dimer. Hence, this work streamlined the analysis of solid residues to exemplary samples. Differential Scanning Calorimetry (DSC) was employed for dried PET residue samples, while dried product samples were subject to High Performance Liquid Chromatography (HPLC).

DSC was employed to determine the melting temperature and enthalpy of samples. For this purpose, samples weighing 5-8 mg were placed into hermetically sealed aluminum pans. They were heated with a heating ramp of  $5 \text{ K min}^{-1}$  in a Q2000 DSC, which was equipped with a RCS90 cooling device by TA instruments (Eschborn, Germany). The sample cell underwent purging with a nitrogen flow of  $50 \text{ ml min}^{-1}$ .

HPLC was employed to determine the composition of samples. Therefore, about 5 mg of the original samples were dissolved in 1 ml of GVL and analyzed in Agilent 1260 Infinity II HPLC. The HPLC was equipped with a C18 column (Agilent Poroshell 120 EC) and UV detector set at 248 nm. An injection volume of  $2 \mu\text{l}$  was utilized, and the column temperature was maintained at  $30^\circ\text{C}$ . The HPLC analysis was performed using a mixture of methanol/water as the mobile phase at a flow rate of  $1 \text{ ml min}^{-1}$ . Initially, 5 v.-% methanol was flushed for 1 minute, followed by a continuous increase in methanol content over 13 minutes until reaching 100 v.-%. Finally, pure methanol was flushed for additional 6 minutes.

## A.5 Measuring methods to access the GVL influence on reaction kinetics

Three experimental procedures were implemented to explore the hypothesis of enhanced kinetics attributed to GVL due to enhanced PET dissolution. Deviations from our con-

ventional procedure described in sections 2.2 and 2.3 or more detailed in A.2 and A.3 are explained below. PET particles with dimensions of  $5 \times 5 \times 0.2$  mm were utilized in all experiments. Additionally, a substantial GVL amount according to  $\frac{m_{GVL}}{m_{EG}^0} = 0.946$  was chosen, along with  $\frac{m_{EG}^0}{m_{PET}^0} = 6$ ,  $T = 190$  °C,  $p = 1$  bar,  $\frac{n_{PETru}}{n_{ZnAc_2}} = 50$  and a stirrer speed of 1400 rpm. In the first procedure, samples were prepared and placed in the heating block following the conventional method described earlier. This involved preparing samples at ambient conditions, subjecting them to 3 minutes of pre-heating, and then proceeding with the required reaction time, resulting in a dead time of 3 minutes. In the second procedure, solvents EG, GVL, and  $ZnAc_2$  were pre-heated for 3 minutes at the reaction temperature. PET was then added, initiating the reaction time, without any dead time. In the third procedure, PET was dissolved in GVL following Chen et al.<sup>5</sup>'s described procedure. The PET particles underwent a 1-hour swelling time at 120 °C in GVL. Afterwards, the suspensions were heated to the reaction temperature, during which PET completely dissolved. The pre-heated catalyst solution containing EG and  $ZnAc_2$  was then added, and the reaction time started, with no dead time applied in these experiments. All subsequent process steps to determine PET conversion  $X_{PET}$ , serving as a measure for the influence of the three different procedures, were conducted as described earlier.

## B. Detailed description of the kinetic model

As already shown in Figure 1, the reversible PET glycolysis reaction can be modeled as reaction of one mole of PET's repeating unit with one mole of EG giving one mole of BHET monomer. The moles  $n$  of the three reactants in the reaction mixture can be accessed from their initial state and the experimentally determined PET conversion over time (see Equation S1) by the following Equations S3, S4 and S5.

$$n_{PETru} = n_{PETru}^0 \cdot \left( 1 - \frac{X_{PET}}{100} \right) \quad (S3)$$

$$n_{EG} = n_{EG}^0 - \frac{X_{PET}}{100} \cdot n_{PETru}^0 \quad (S4)$$

$$n_{BHET} = n_{BHET}^0 + \frac{X_{PET}}{100} \cdot n_{PETru}^0 \quad (S5)$$

The mole fraction  $x_i$  of the component  $i$  is determined by dividing the number of moles  $n_i$  by the total number of moles in the reaction system, as expressed in Equation S6.

$$x_i = \frac{n_i}{\sum_{j=1}^N n_j} \quad (S6)$$

Building on that, Equation S7 defines the  $K_x$  as equilibrium (eq) composition of the reaction mixture.

$$K_x = \frac{x_{BHET}^{eq}}{x_{PETru}^{eq} \cdot x_{EG}^{eq}} \quad (S7)$$

In terms of kinetic modeling, the change of the mole fractions of the reactants along the reaction coordinate can be described via Equation S8.

$$\frac{dx_{PETru}}{dt} = \frac{dx_{EG}}{dt} = -\frac{dx_{BHET}}{dt} = -k \cdot x_{PETru} \cdot x_{EG} + \frac{k}{K_x} \cdot x_{BHET} \quad (S8)$$

The set of differential equations was solved using Matlab<sup>TM</sup>'s *ODE15s* solver, with the initial composition of the reactants serving as the initial condition. Simultaneously, using Matlab<sup>TM</sup>'s internal function *lscurvefit* the kinetic constant  $k$  was fitted to the experimental data calculated by Equations S3, S4 and S5 and transferred to mole fractions by Equation S6. Additionally, the *nlparci* function generated the 95% confidence interval for the  $k$  estimate.



## C. Validation of pseudo-first order reversible reaction approach

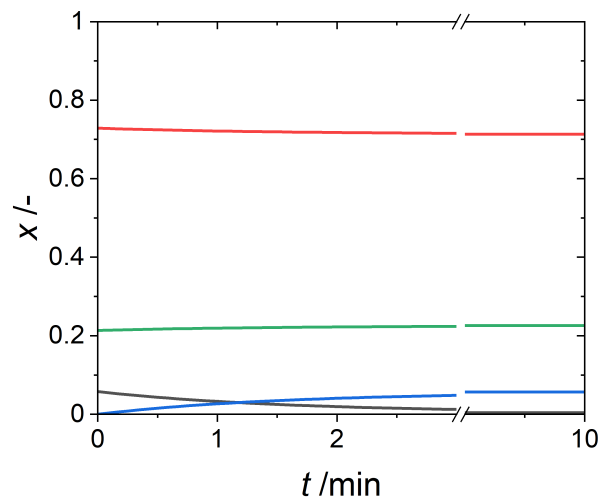

Figure S3: Mole fraction of EG (red), GVL (green), PETru (grey) and BHET (blue) over reaction time modeled via pseudo-first order reversible reaction approach with the kinetic constant  $k$  of  $0.0138 \text{ s}^{-1}$  and an equilibrium constant  $K_x$  of 19.37. Initial conditions were  $n_{PET}^0 = 0.0034 \text{ mol}$ ,  $n_{EG} = 0.0428 \text{ mol}$ ,  $n_{BHET} = 0 \text{ mol}$  and  $n_{GVL} = 0.0125 \text{ mol}$ .

## D. Pressure influence on reaction kinetics

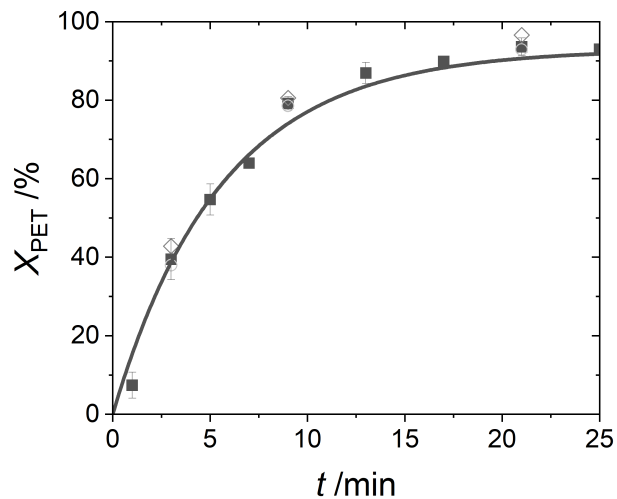

Figure S4: PET conversion  $X_{PET}$  over reaction time  $t$  for different pressures:  $p = 1$  bar (squares full),  $p = 2$  bar (circles open) and  $p = 3$  bar (diamonds open) at  $T = 190$  °C with  $\frac{m_{GVL}}{m_{EG}^0} = 0$ ,  $\frac{m_{EG}^0 + m_{GVL}}{m_{PET}^0} = 6$ ,  $\frac{n_{PETru}}{n_{ZnAc_2}} = 50$ ,  $0.2 \leq d_p < 1$  mm and a stirrer speed of 1400 rpm experimentally determined (symbols) and modeled for  $T = 190$  °C &  $p = 1$  bar (line) via pseudo-first order reversible reaction approach with the kinetic constant  $k$  of  $0.0029$  s<sup>-1</sup> and an equilibrium constant  $K_x$  of 14.04.

## E. Temperature selection for pressurized reactions

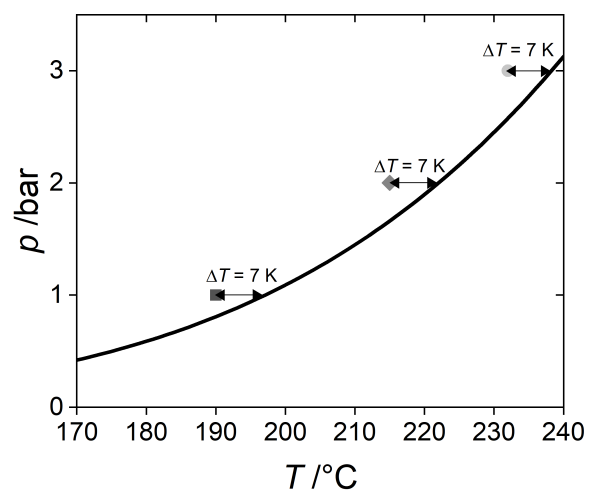

Figure S5: Vapor pressure of EG as a function of temperature.<sup>6</sup> To prevent boiling of the solvent/reactant EG an uniform temperature difference of 7 K from the boiling curve was chosen. The so-chosen reaction conditions were 1 bar & 190  $^{\circ}\text{C}$  (dark grey square), 2 bar & 215  $^{\circ}\text{C}$  (mid-grey diamond) and 3 bar & 232  $^{\circ}\text{C}$  (light grey circle).

# F. Analytical results

## F.1 HPLC Results

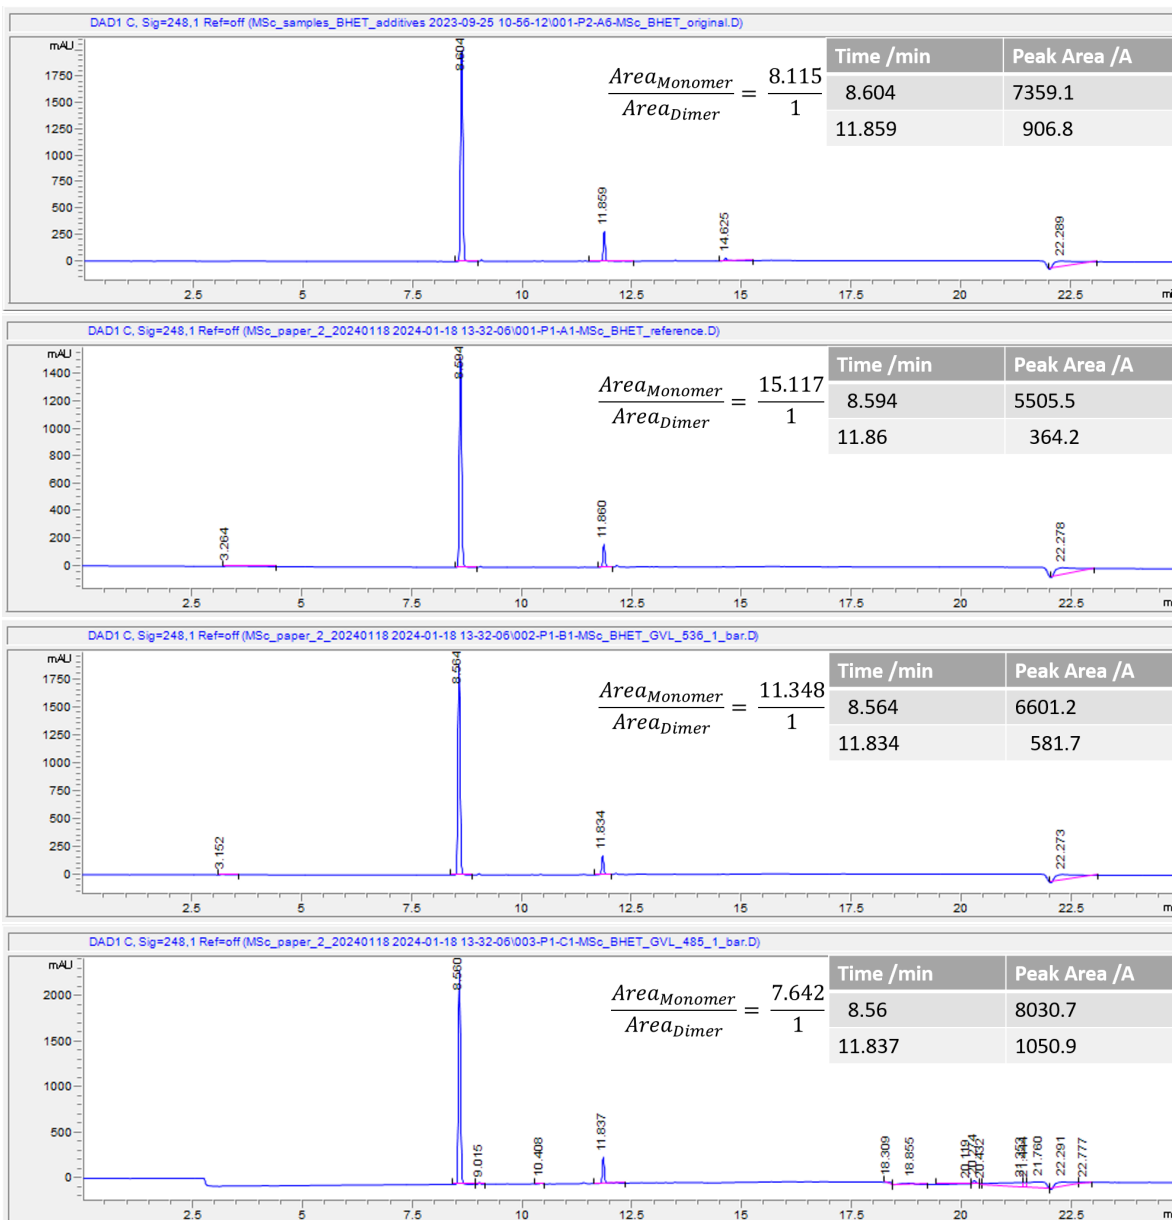

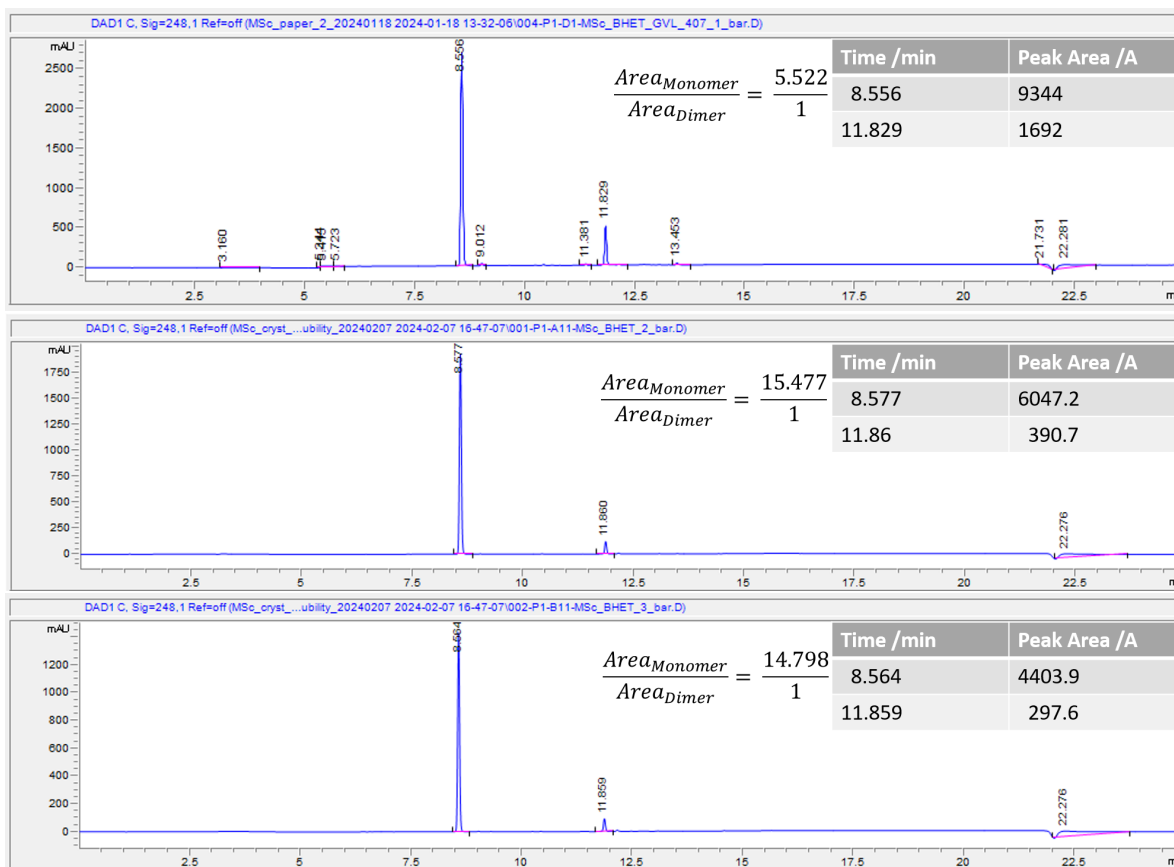

Figure S7: Determined HPLC chromatograms of the bought BHET monomer by Sigma-Aldrich (top) and BHET produced by ourselves in the following experiments: reference ( $m_{GVL} / m_{EG}^0 = 0$  &  $T = 190$  °C &  $p = 1$  bar); ( $m_{GVL} / m_{EG}^0 = 0.118$  &  $T = 190$  °C &  $p = 1$  bar); ( $m_{GVL} / m_{EG}^0 = 0.236$  &  $T = 190$  °C &  $p = 1$  bar); ( $m_{GVL} / m_{EG}^0 = 0.473$  &  $T = 190$  °C &  $p = 1$  bar); ( $m_{GVL} / m_{EG}^0 = 0$  &  $T = 215$  °C &  $p = 2$  bar); ( $m_{GVL} / m_{EG}^0 = 0$  &  $T = 232$  °C &  $p = 3$  bar) (from top to bottom)

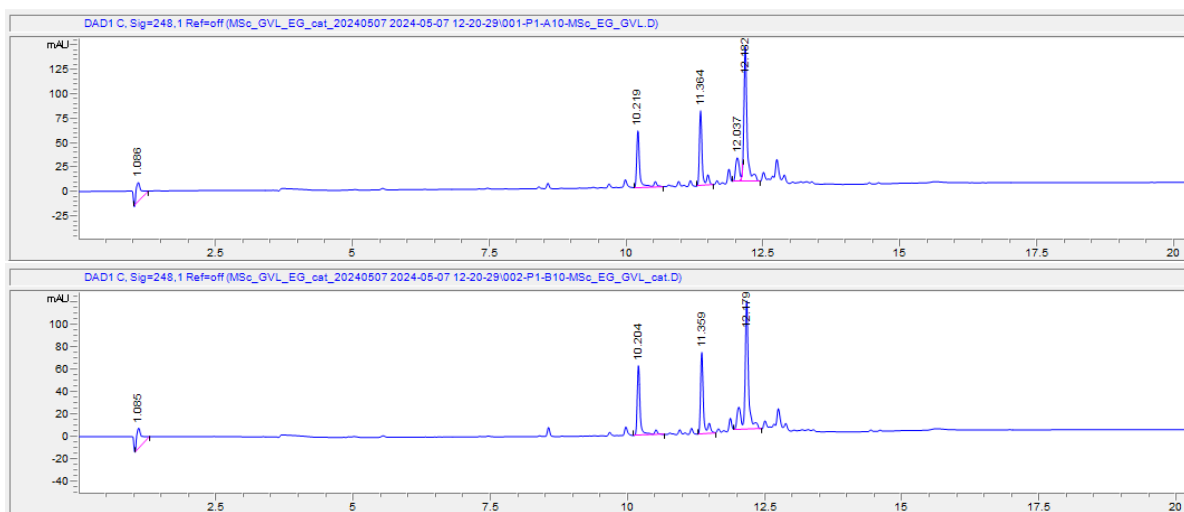

Figure S8: Determined HPLC chromatograms of retrieved filtrates after BHET filtration without  $\text{ZnAc}_2$  catalysed reaction (top) with  $\text{ZnAc}_2$  catalysed reaction (bottom) indicate no GVL reaction products due to a possible reaction between  $\text{ZnAc}_2$  and GVL.

# F2 DSC Results

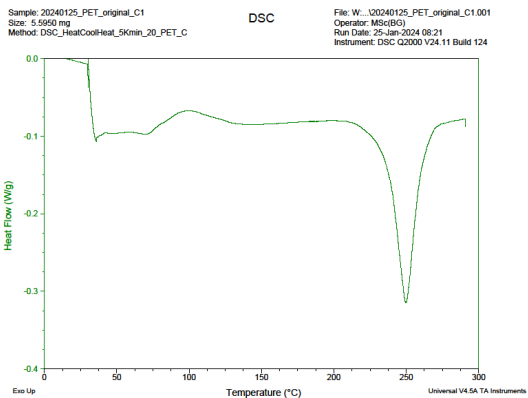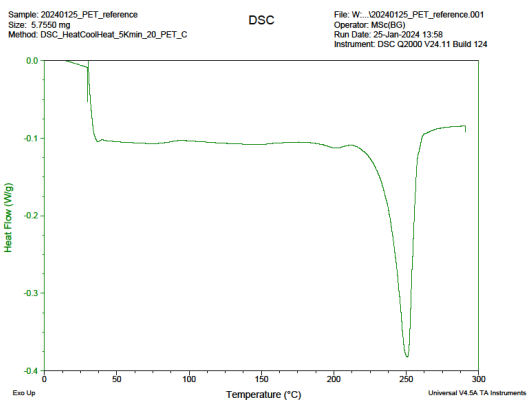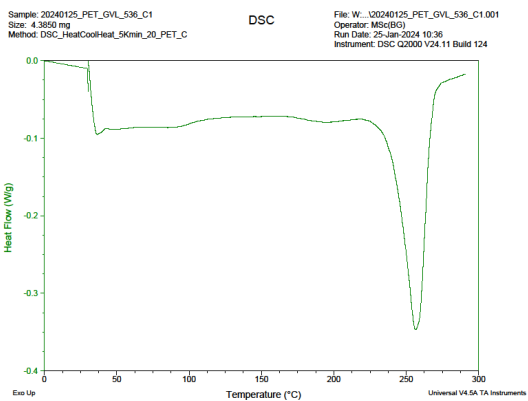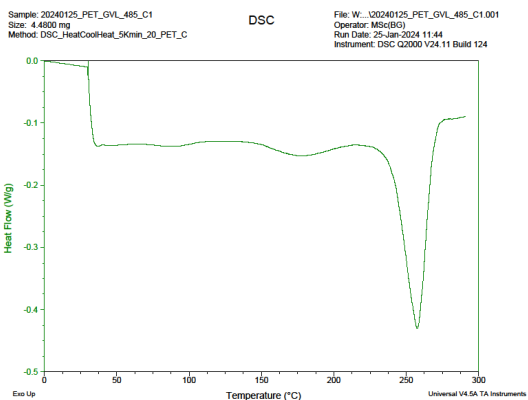

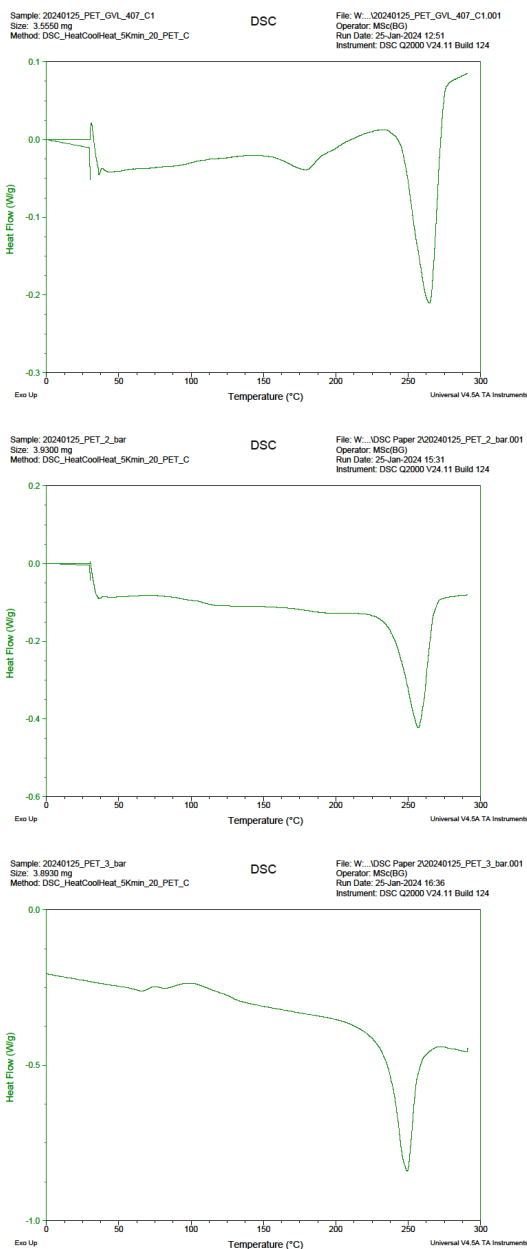

Figure S10: Determined DSC chromatograms of the PET starting material and PET residues from the following experiments: reference ( $m_{GVL} / m_{EG}^0 = 0$  &  $T = 190^\circ\text{C}$  &  $p = 1$  bar); ( $m_{GVL} / m_{EG}^0 = 0.118$  &  $T = 190^\circ\text{C}$  &  $p = 1$  bar); ( $m_{GVL} / m_{EG}^0 = 0.236$  &  $T = 190^\circ\text{C}$  &  $p = 1$  bar); ( $m_{GVL} / m_{EG}^0 = 0.473$  &  $T = 190^\circ\text{C}$  &  $p = 1$  bar); ( $m_{GVL} / m_{EG}^0 = 0$  &  $T = 215^\circ\text{C}$  &  $p = 2$  bar); ( $m_{GVL} / m_{EG}^0 = 0$  &  $T = 232^\circ\text{C}$  &  $p = 3$  bar) (from top to bottom)



## G. Summarized experimental and modeling results of the kinetic series

Table S2: Experimental and modeling results of the kinetic series investigated in this work.

|                         | Objective                              |                        | Reference | GVL influence |        |        |
|-------------------------|----------------------------------------|------------------------|-----------|---------------|--------|--------|
|                         | Series                                 | No.                    |           | 1             | 2      | 3      |
| Investigated parameters | $\frac{m_{GVL}^0}{m_{EG}^0}$           | /g·g <sup>-1</sup>     | 0         | 0.118         | 0.236  | 0.473  |
|                         | $\frac{m_{EG}^0+m_{GVL}^0}{m_{PET}^0}$ | /g·g <sup>-1</sup>     | 6         | 6             | 6      | 6      |
|                         | $\frac{m_{EG}^0}{m_{PET}^0}$           | /g·g <sup>-1</sup>     | 6         | 5.36          | 4.85   | 4.07   |
|                         | $p$                                    | /bar                   | 1         | 1             | 1      | 1      |
|                         | $T$                                    | /°C                    | 190       | 190           | 190    | 190    |
| Experimental results    | $t^{eq}$                               | /min                   | ≈ 21      | ≈ 9           | ≈ 7    | ≈ 5    |
|                         | $X_{PET}^{eq}$                         | /%                     | 92.99     | 91.92         | 90.24  | 93.25  |
|                         | $K_x$                                  | /mol·mol <sup>-1</sup> | 14.04     | 12.98         | 11.35  | 19.37  |
|                         | $Y_{BHET}^{process,eq}$                | /%                     | 79.98     | 72.52         | 61.28  | 54.73  |
|                         | $x_{Monomer}^{product}$                | /mol·mol <sup>-1</sup> | 0.9514    | 0.9398        | 0.9281 | 0.9214 |
| Initial conditions      | $n_{PETru}^0$                          | /mol                   | 0.0035    | 0.0034        | 0.0034 | 0.0034 |
|                         | $n_{EG}^0$                             | /mol                   | 0.0650    | 0.0564        | 0.0510 | 0.0428 |
|                         | $n_{BHET}^0$                           | /mol                   | 0         | 0             | 0      | 0      |
|                         | $n_{GVL}$                              | /mol                   | 0         | 0.0041        | 0.0075 | 0.0125 |
| Modeling results        | $k$                                    | /s <sup>-1</sup>       | 0.0029    | 0.0055        | 0.0080 | 0.0138 |
|                         | $k$ lower limit                        | /s <sup>-1</sup>       | 0.0027    | 0.0051        | 0.0076 | 0.0127 |
|                         | $k$ upper limit                        | /s <sup>-1</sup>       | 0.0030    | 0.0059        | 0.0085 | 0.0149 |
|                         | $\frac{k}{k_{ref}}$                    | /-                     | 1         | 1.9028        | 2.7952 | 4.799  |
|                         | $\frac{k}{k_{ref}}$ lower limit        | /-                     | 0.9492    | 1.7692        | 2.6327 | 4.4082 |
|                         | $\frac{k}{k_{ref}}$ upper limit        | /-                     | 1.0508    | 2.0364        | 2.9575 | 5.1918 |

|                         | Objective                              |                        | Reference | Pressure and Temperature influence |         | Combined |
|-------------------------|----------------------------------------|------------------------|-----------|------------------------------------|---------|----------|
|                         | Series                                 | No.                    | 1         | 5                                  | 6       | 7        |
| Investigated parameters | $\frac{m_{GVL}^0}{m_{EG}^0}$           | /g·g <sup>-1</sup>     | 0         | 0                                  | 0       | 0.118    |
|                         | $\frac{m_{EG}^0+m_{GVL}^0}{m_{PET}^0}$ | /g·g <sup>-1</sup>     | 6         | 6                                  | 6       | 6        |
|                         | $\frac{m_{EG}^0}{m_{PET}^0}$           | /g·g <sup>-1</sup>     | 6         | 6                                  | 6       | 5.36     |
|                         | $p$                                    | /bar                   | 1         | 2                                  | 3       | 3        |
|                         | $T$                                    | /°C                    | 190       | 215                                | 232     | 232      |
| Experimental results    | $t^{eq}$                               | /min                   | ≈ 21      | ≈ 4                                | ≈ 0.75  | ≈ 0.25   |
|                         | $X_{PET}^{eq}$                         | /%                     | 92.99     | 93.58                              | 95.94   | 95.9     |
|                         | $K_x$                                  | /mol·mol <sup>-1</sup> | 14.04     | 15.43                              | 24.97   | 26.71    |
|                         | $Y_{BHET}^{process}$                   | /%                     | 79.98     | 79.13                              | 80.15   | 75.17    |
|                         | $x_{Monomer}^{product}$                | /mol·mol <sup>-1</sup> | 0.9514    | 0.9524                             | 0.9503  | n.a.     |
| Initial conditions      | $n_{PETru}^0$                          | /mol                   | 0.0035    | 0.0035                             | 0.0035  | 0.0034   |
|                         | $n_{EG}^0$                             | /mol                   | 0.0650    | 0.0650                             | 0.0650  | 0.0564   |
|                         | $n_{BHET}^0$                           | /mol                   | 0         | 0                                  | 0       | 0        |
|                         | $n_{GVL}$                              | /mol                   | 0         | 0                                  | 0       | 0.0041   |
| Modeling results        | $k$                                    | /s <sup>-1</sup>       | 0.0029    | 0.0134                             | 0.0705  | 0.1971   |
|                         | $k$ lower limit                        | /s <sup>-1</sup>       | 0.0027    | 0.0125                             | 0.0663  | 0.1820   |
|                         | $k$ upper limit                        | /s <sup>-1</sup>       | 0.0030    | 0.0166                             | 0.0747  | 0.2121   |
|                         | $\frac{k}{k_{ref}}$                    | /-                     | 1         | 4.6796                             | 24.541  | 68.5908  |
|                         | $\frac{k}{k_{ref}}$ lower limit        | /-                     | 0.9492    | 4.3615                             | 23.0881 | 63.3616  |
|                         | $\frac{k}{k_{ref}}$ upper limit        | /-                     | 1.0508    | 5.7694                             | 25.9937 | 73.82    |

## References

- (1) Schlüter, M.; Bhutani, S.; Bahr, J.; Wohlgemuth, K.; Held, C. Measurement and PC-SAFT Modeling of the Solubility of the BHET Monomer, the BHET Dimer, and PET in Single Solvents. *Journal of Chemical & Engineering Data* **2024**,
- (2) Javed, S.; Fisse, J.; Vogt, D. Optimization and Kinetic Evaluation for Glycolytic Depolymerization of Post-Consumer PET Waste with Sodium Methoxide. *Polymers* **2023**, *15*.
- (3) López-Fonseca, R.; Duque-Ingunza, I.; de Rivas, B.; Arnaiz, S.; Gutiérrez-Ortiz, J. I. Chemical recycling of post-consumer PET wastes by glycolysis in the presence of metal salts. *Polymer Degradation and Stability* **2010**, *95*, 1022–1028.
- (4) López-Fonseca, R.; Duque-Ingunza, I.; de Rivas, B.; Flores-Giraldo, L.; Gutiérrez-Ortiz, J. I. Kinetics of catalytic glycolysis of PET wastes with sodium carbonate. *Chemical Engineering Journal* **2011**, *168*, 312–320.
- (5) Chen, W.; Yang, Y.; Lan, X.; Zhang, B.; Zhang, X.; Mu, T. Biomass-derived  $\gamma$ -valerolactone: efficient dissolution and accelerated alkaline hydrolysis of polyethylene terephthalate. *Green Chemistry* **2021**, *23*, 4065–4073.
- (6) Jones, W. S.; Tamplin, W. S. Physical Properties of Ethylene Glycol in Glycols. Curme, GO. 1952.
